# Supplementary material
Source: HighWire-hosted journal article supplement (https://bmjopen.bmj.com/content/11/12/e052830)
Supplement: inline-supplementary-material-1 [file inline-supplementary-material-1.pdf]

Table S1. The baseline characteristics of included studies and patients

| Study                  | Country | Sample size<br>(Malignant/Benign) | Age<br>(years) | Type of ovarian cancer                               | Modality   | Route/agent       | US machine    | TP | FP | FN | TN  |
|------------------------|---------|-----------------------------------|----------------|------------------------------------------------------|------------|-------------------|---------------|----|----|----|-----|
| Weiner 1992 [S1]       | Israel  | 53 (17/36)                        | NA             | NA                                                   | Doppler US | Transvaginal/none | SSD 680       | 16 | 1  | 1  | 35  |
| Kurjak 1992 [S2]       | Croatia | 83 (29/54)                        | NA             | NA                                                   | US         | Transvaginal/none | SSD 680       | 14 | 1  | 15 | 53  |
|                        |         |                                   |                |                                                      | Doppler US | Transvaginal/none | SSD 680       | 28 | 3  | 1  | 51  |
| Kurjak 1992 [S3]       | Croatia | 174 (38/136)                      | 48.0           | Pa (18), A (10), E (3), GrC (2), Me (5)              | US         | Transvaginal/none | SSD 680       | 35 | 7  | 3  | 129 |
|                        |         |                                   |                |                                                      | Doppler US | Transvaginal/none | SSD 680       | 37 | 0  | 1  | 136 |
| Schneider 1993<br>[S4] | USA     | 55 (16/39)                        | 67.0           | NA                                                   | US         | Both/none         | Acuson 128    | 14 | 6  | 2  | 33  |
|                        |         |                                   |                |                                                      | Doppler US | Both/none         | Acuson 128    | 15 | 16 | 1  | 23  |
| Brown 1994 [S5]        | USA     | 44 (8/36)                         | 42.3           | C (4), B (2), SCL (1), MMT (1)                       | Doppler US | Both/none         | Acuson 128    | 8  | 19 | 0  | 17  |
| Zanetta 1994 [S6]      | Italy   | 80 (33/47)                        | NA             | NA                                                   | US         | Transvaginal/none | ATL Ultramark | 25 | 0  | 8  | 47  |
|                        |         |                                   |                |                                                      | Doppler US | Transvaginal/none | ATL Ultramark | 29 | 1  | 4  | 46  |
| Levine 1994 [S7]       | USA     | 35 (7/28)                         | 42.0           | NA                                                   | US         | Transvaginal/none | Acuson 128    | 7  | 3  | 0  | 25  |
| Jain 1994 [S8]         | USA     | 50 (10/40)                        | 43.0           | NA                                                   | US         | Transvaginal/none | Acuson 128    | 10 | 2  | 0  | 38  |
|                        |         |                                   |                |                                                      | Doppler US | Transvaginal/none | Acuson 128    | 8  | 6  | 2  | 34  |
| Bromley 1994 [S9]      | USA     | 33 (12/21)                        | NA             | NA                                                   | US         | Both/none         | Acuson 128    | 8  | 4  | 4  | 17  |
|                        |         |                                   |                |                                                      | Doppler US | Both/none         | Acuson 128    | 7  | 10 | 1  | 11  |
| Salem 1994 [S10]       | Canada  | 102 (13/89)                       | NA             | P (10), Me (3)                                       | Doppler US | Transvaginal/none | Acuson 128    | 10 | 17 | 3  | 65  |
| Wu 1994 [S11]          | China   | 228 (76/152)                      | 41.3           | Ep (34), GC (6), Me (18), B (6), others (4)          | Doppler US | Transvaginal/none | SSD680        | 72 | 29 | 4  | 123 |
| Chou 1994 [S12]        | China   | 108 (25/83)                       | 38.0           | S (10), M (3), E (2), CC (1), ES (3), IT (1), Me (5) | Doppler US | Transvaginal/none | SSD680        | 22 | 7  | 3  | 76  |
| Franchi 1995 [S13]     | Italy   | 129 (37/92)                       | 44.0           | B (7), S (19), M (2), other (9)                      | US         | Both/none         | Au450         | 31 | 15 | 6  | 77  |
|                        |         |                                   |                |                                                      | Doppler US | Both/none         | Au450         | 28 | 26 | 9  | 66  |
| Stein 1995 [S14]       | USA     | 169 (46/123)                      | 39.4           | NA                                                   | US         | Both/none         | NA            | 35 | 38 | 11 | 85  |
|                        |         |                                   |                |                                                      | Doppler US | Both/none         | NA            | 45 | 47 | 1  | 76  |

|                        |           |              |      |                                                                            |            |                   |                |    |    |   |     |
|------------------------|-----------|--------------|------|----------------------------------------------------------------------------|------------|-------------------|----------------|----|----|---|-----|
| Tepper 1995 [S15]      | Israel    | 203 (38/165) | 44.3 | S (19), M (6), E (2), GrC (3), MT (2), SCS (1), U (3), stromal (1), GC (1) | Doppler US | Transvaginal/none | SSD680         | 38 | 43 | 0 | 122 |
| Taylor 1996 [S16]      | UK        | 51 (9/42)    | 44.5 | M (1), S (2), E (1), CC (3), Pa (1), GrC (1)                               | Doppler US | Transvaginal/none | Acuson 128     | 9  | 9  | 0 | 33  |
| Prompeler 1996 [S17]   | Germany   | 212 (68/144) | 60.5 | P (50), T (2), Me (5), GrC (1), ES (1), LMP (9)                            | Doppler US | Transvaginal/none | ATL Ultramark  | 67 | 19 | 1 | 125 |
| Rehn 1996 [S18]        | Germany   | 310 (51/259) | 43.5 | P (45), Me (6)                                                             | US         | Transvaginal/none | Acuson 128     | 46 | 91 | 5 | 168 |
|                        |           |              |      |                                                                            | Doppler US | Transvaginal/none | Acuson 128     | 43 | 70 | 8 | 189 |
| Caruso 1996 [S19]      | Italy     | 122 (21/101) | 38.4 | A (13), S (4), M (1), Pa (3)                                               | US         | Transvaginal/none | Au570          | 21 | 25 | 0 | 76  |
|                        |           |              |      |                                                                            | Doppler US | Transvaginal/none | Au570          | 21 | 4  | 0 | 97  |
| Anandakumar 1996 [S20] | Singapore | 156 (34/122) | 36.7 | NA                                                                         | Doppler US | Transvaginal/none | Acuson 128     | 26 | 39 | 8 | 83  |
| Matthes 1996 [S21]     | Brazil    | 43 (10/33)   | 45.7 | NA                                                                         | US         | NA                | NA             | 8  | 7  | 2 | 26  |
| Komatsu 1996 [S22]     | Japan     | 82 (34/48)   | 45.9 | NA                                                                         | US         | Transvaginal/none | Acuson 128     | 33 | 26 | 1 | 22  |
| Buy 1996 [S23]         | France    | 132 (34/98)  | 43.5 | NA                                                                         | US         | Transvaginal/none | ATL Ultramark  | 30 | 3  | 4 | 95  |
|                        |           |              |      |                                                                            | Doppler US | Transvaginal/none | ATL Ultramark  | 27 | 18 | 7 | 80  |
| Strigini 1996 [S24]    | Italy     | 128 (19/109) | 43.0 | NA                                                                         | US         | Transvaginal/none | Au590          | 16 | 6  | 3 | 103 |
|                        |           |              |      |                                                                            | Doppler US | Transvaginal/none | Au590          | 16 | 28 | 3 | 81  |
| Taylor 1997 [S25]      | UK        | 64 (12/52)   | 45.3 | NA                                                                         | Doppler US | Transvaginal/none | Acuson 128     | 12 | 10 | 0 | 42  |
| Valentin 1997 [S26]    | Sweden    | 151 (24/127) | NA   | NA                                                                         | US         | Transvaginal/none | Acuson 128     | 24 | 77 | 0 | 50  |
| Reles 1997 [S27]       | Germany   | 98 (29/69)   | NA   | B (4), P (18), other (7)                                                   | US         | Transvaginal/none | Acuson 128     | 26 | 11 | 3 | 58  |
|                        |           |              |      |                                                                            | Doppler US | Transvaginal/none | Acuson 128     | 26 | 18 | 1 | 51  |
| Yang 1998 [S28]        | China     | 69 (7/62)    | 39.0 | B (6), E (1)                                                               | US         | Transvaginal/none | HDI 3000       | 6  | 3  | 1 | 59  |
| Buckshee 1998 [S29]    | India     | 36 (9/27)    | NA   | Ep (8), IT (1)                                                             | US         | Transvaginal/none | Sonoline Versa | 9  | 4  | 0 | 23  |
|                        |           |              |      |                                                                            | Doppler US | Transvaginal/none | Sonoline Versa | 6  | 1  | 3 | 26  |

|                     |          |               |      |                                                                                  |            |                       |                      |     |     |    |     |
|---------------------|----------|---------------|------|----------------------------------------------------------------------------------|------------|-----------------------|----------------------|-----|-----|----|-----|
| Emoto 1998 [S30]    | Japan    | 143 (43/100)  | 44.4 | B (12), P (31)                                                                   | Doppler US | Transvaginal/none     | SSD 680              | 39  | 53  | 4  | 47  |
| Alcazar 1999 [S31]  | Spain    | 167 (42/125)  | 45.7 | P (30), LMP (6), Me (6)                                                          | Doppler US | Transvaginal/none     | Philips P-700 SE     | 40  | 72  | 2  | 53  |
| Schelling 2000      | Germany  | 257 (39/218)  | NA   | LMP (4), S (23), M (5), E (2), GrC (2), other (3)                                | US         | Transvaginal/none     | Sonoline Elegra      | 38  | 41  | 1  | 177 |
| [S32]               |          | 63 (22/41)    | NA   | LMP (4), S (11), M (1), U (2), CC (1), E (1), other (2)                          | US         | Transvaginal/none     | Sonoline Elegra      | 21  | 13  | 1  | 28  |
|                     |          |               |      |                                                                                  | Doppler US | Transvaginal/none     | Sonoline Elegra      | 21  | 4   | 1  | 37  |
| Kupescic 2000 [S33] | Croatia  | 45 (12/33)    | 49.7 | NA                                                                               | CEUS       | Transvaginal/Levovist | Voluson 530          | 12  | 2   | 0  | 31  |
| Wanapirak 2001      | Thailand | 185 (65/120)  | 44.8 | NA                                                                               | US         | Transabdominal/none   | Aloka 5000           | 55  | 36  | 10 | 84  |
| [S34]               |          |               |      |                                                                                  |            |                       |                      |     |     |    |     |
| Guerriero 2001      | Italy    | 328 (71/257)  | 42.0 | S (37), M (9), E (8), CC (2), U (4)                                              | US         | Transvaginal/none     | Acuson 128           | 71  | 47  | 0  | 211 |
| [S35]               |          |               |      |                                                                                  | Doppler US | Transvaginal/none     | Acuson 128           | 71  | 18  | 0  | 239 |
|                     | Spain    | 328 (70/258)  | 44.0 | S (39), M (11), E (5), CC (1), U (6)                                             | US         | Transvaginal/none     | SSA 370              | 66  | 44  | 4  | 214 |
|                     |          |               |      |                                                                                  | Doppler US | Transvaginal/none     | SSA 370              | 61  | 13  | 9  | 245 |
| Kurjak 2001 [S36]   | Croatia  | 251 (30/221)  | 54.0 | S (17), M (9), YS (1), GrC (1), FT (2)                                           | CEUS       | Transvaginal/Levovist | Voluson 530          | 30  | 2   | 0  | 219 |
|                     |          |               |      |                                                                                  | Doppler US | Transvaginal/none     | Voluson 530/SSD 2000 | 56  | 8   | 4  | 434 |
|                     |          |               |      |                                                                                  | US         | Transvaginal/none     | SSD 2000             | 50  | 20  | 10 | 422 |
| Marret 2002 [S37]   | France   | 124 (12/112)  | 42.1 | NA                                                                               | Doppler US | Transvaginal/none     | Catana 5             | 11  | 34  | 1  | 78  |
| Guerriero 2002      | Italy    | 826 (147/679) | 40.0 | NA                                                                               | US         | Transvaginal/none     | SSA 370              | 146 | 109 | 1  | 570 |
| [S38]               |          |               |      |                                                                                  | Doppler US | Transvaginal/none     | SSA 370              | 140 | 41  | 7  | 638 |
| Alcazar 2003 [S39]  | Spain    | 44 (21/23)    | 49.3 | NA                                                                               | Doppler US | Transvaginal/none     | SSA 370              | 40  | 14  | 2  | 32  |
| Ueland 2003 [S40]   | USA      | 442 (53/389)  | 50.0 | NA                                                                               | US         | Transvaginal/none     | GE Logiq             | 52  | 75  | 1  | 314 |
| Itakura 2003 [S41]  | Japan    | 95 (31/64)    | 49.2 | S (10), M (3), CC (4), E (2), U (2), Un (1), Me (1), GrC (2), S-B (3), tubal (3) | Doppler US | Transvaginal/none     | Logiq 500            | 28  | 17  | 3  | 47  |
| Gu 2003 [S42]       | China    | 19 (12/7)     | 42.2 | NA                                                                               | CEUS       | Transvaginal/Levovist | ATL Ultramark        | 12  | 2   | 0  | 5   |
| Orden 2003 [S43]    | Finland  | 66 (14/52)    | 49.4 | U-solid (1), M-solid (7), solid (6)                                              | CEUS       | Transvaginal/Levovist | Sequoia 512          | 13  | 4   | 1  | 48  |
| D'Arcy 2004 [S44]   | UK       | 20 (4/16)     | 49.0 | NA                                                                               | CEUS       | Transvaginal/Levovist | Sequoia 512          | 4   | 1   | 0  | 15  |
| Marret 2004 [S45]   | France   | 101 (23/78)   | 46.2 | NA                                                                               | CEUS       | Transvaginal/Levovist | MPX                  | 22  | 2   | 1  | 76  |

|                         |          |              |      |                                                 |            |                        |                  |    |    |   |     |
|-------------------------|----------|--------------|------|-------------------------------------------------|------------|------------------------|------------------|----|----|---|-----|
| Alcazar 2005 [S46]      | Spain    | 69 (45/24)   | 48.4 | P (30), LMP (4), Me (11)                        | Doppler US | Transvaginal/none      | SonoAce SA-9900  | 88 | 8  | 2 | 40  |
| Marret 2005 [S47]       | France   | 101 (23/78)  | 46.2 | P (21), B (2)                                   | Doppler US | Transvaginal/none      | MPX              | 23 | 2  | 0 | 76  |
| Erdogan 2005 [S48]      | Turkey   | 63 (21/42)   | 48.2 | NA                                              | Doppler US | Transabdominal/none    | PowerVision 6000 | 21 | 2  | 0 | 40  |
| Testa 2007 [S49]        | Belgium  | 33 (9/24)    | 41.0 | NA                                              | CEUS       | Transvaginal/SonoVue   | MPX              | 9  | 14 | 0 | 10  |
|                         |          |              |      |                                                 | Doppler US | Transvaginal/none      | MPX              | 9  | 8  | 0 | 16  |
| Testa 2009 [S50]        | Italy    | 89 (37/52)   | 50.0 | B (10), Ep (17), non-Ep (3), tubal (3), Me (4)  | CEUS       | Transvaginal/SonoVue   | MPX              | 37 | 13 | 0 | 39  |
|                         |          |              |      |                                                 | Doppler US | Transvaginal/none      | MPX              | 35 | 29 | 2 | 23  |
| Fleischer 2009 [S51]    | USA      | 36 (10/26)   | 48.3 | S (5), E (2), Me (2), B-M (1)                   | CEUS       | Transvaginal/Definity  | iU22             | 10 | 1  | 0 | 25  |
| Zhou 2009 [S52]         | China    | 65 (30/35)   | 46.6 | NA                                              | US         | Transabdominal/none    | GE Logiq7        | 29 | 1  | 1 | 34  |
|                         |          |              |      |                                                 | Doppler US | Transabdominal/none    | GE Logiq7        | 22 | 5  | 8 | 30  |
| Veyer 2010 [S53]        | France   | 42 (12/30)   | 49.7 | S (3), CC (3), Me (2), E (2), ES (1), other (1) | CEUS       | Transvaginal/SonoVue   | MTX              | 10 | 8  | 2 | 22  |
| Hassan 2011 [S54]       | China    | 52 (22/30)   | 45.0 | NA                                              | CEUS       | Transvaginal/SonoVue   | GE Logiq         | 22 | 5  | 0 | 25  |
| Zheng 2011 [S55]        | China    | 36 (14/22)   | 41.0 | NA                                              | CEUS       | Transabdominal/SonoVue | GE Logiq         | 14 | 2  | 0 | 22  |
| Huchon 2012 [S56]       | France   | 99 (11/88)   | 45.8 | U (1), U-solid (2), M (2), M-solid (6)          | US         | Transvaginal/none      | ATL HDI 5000     | 6  | 5  | 5 | 83  |
|                         |          |              |      |                                                 | CEUS       | Transvaginal/Levovist  | Voluson 730      | 9  | 9  | 2 | 79  |
| Wang 2012 [S57]         | China    | 49 (20/29)   | NA   | NA                                              | CEUS       | Transabdominal/SonoVue | Philips iU22     | 20 | 1  | 0 | 28  |
| Hafeez 2013 [S58]       | Pakistan | 78 (42/36)   | NA   | NA                                              | US         | Transabdominal/none    | NEMIO XG         | 38 | 2  | 4 | 34  |
| Kalmantis 2013 [S59]    | Greece   | 318 (93/225) | 47.4 | NA                                              | Doppler US | Transvaginal/none      | Voluson 730      | 87 | 16 | 6 | 209 |
| Perez-Medina 2013 [S60] | Spain    | 72 (41/31)   | 53.2 | NA                                              | Doppler US | Transvaginal/none      | Voluson 730      | 35 | 6  | 6 | 25  |
| Shah 2013 [S61]         | India    | 84 (40/44)   | NA   | NA                                              | US         | Transabdominal/none    | NEMIO XG         | 35 | 24 | 5 | 20  |
|                         |          |              |      |                                                 | Doppler US | Transabdominal/none    | NEMIO XG         | 39 | 14 | 1 | 30  |
| Xiang 2013 [S62]        | China    | 51 (8/43)    | 46.5 | NA                                              | CEUS       | Transvaginal/SonoVue   | MyLab90          | 8  | 1  | 0 | 42  |

|                          |            |              |      |                                                                |            |                        |              |    |    |    |     |
|--------------------------|------------|--------------|------|----------------------------------------------------------------|------------|------------------------|--------------|----|----|----|-----|
| Zhang 2013 [S63]         | China      | 48 (25/23)   | 48.3 | NA                                                             | CEUS       | Transabdominal/SonoVue | GE Logiq     | 24 | 1  | 1  | 22  |
|                          |            |              |      |                                                                | Doppler US | Transvaginal/none      | GE Logiq     | 22 | 3  | 3  | 20  |
| Yang 2013 [S64]          | China      | 106 (75/31)  | 44.4 | NA                                                             | US         | Transabdominal/none    | Philips iU22 | 69 | 10 | 6  | 21  |
|                          |            |              |      |                                                                | CEUS       | Transabdominal/SonoVue | Philips iU22 | 70 | 3  | 5  | 28  |
| Abbas 2014 [S65]         | Egypt      | 161 (46/115) | 35.2 | NA                                                             | Doppler US | Both/none              | SonoAce X8   | 37 | 18 | 9  | 97  |
| Zhang 2014 [S66]         | China      | 120 (48/72)  | 39.6 | C (27), Me (4), IT (4), CC (2), E (2), SC (1), ES (1), B (7)   | CEUS       | Transabdominal/SonoVue | Sequoia 512  | 43 | 2  | 5  | 70  |
| Hu 2014 [S67]            | China      | 57 (10/47)   | NA   | GrC (2), A (1), B-S (1), Re (2), SLC (1), tubal S (3)          | CEUS       | Transvaginal/SonoVue   | MyLab90      | 10 | 15 | 0  | 32  |
| Utrilla-Layna 2015 [S68] | Spain      | 367 (86/281) | 45.8 | B (4), P-Ep (61), P non-Ep (4), Me (16), R (1)                 | Doppler US | Transvaginal/none      | Voluson 730  | 84 | 60 | 2  | 221 |
| Zhang 2015 [S69]         | China      | 102 (37/65)  | 37.2 | NA                                                             | US         | Transvaginal/none      | Acuson 512   | 29 | 3  | 8  | 62  |
|                          |            |              |      |                                                                | Doppler US | Transvaginal/none      | Acuson 512   | 23 | 9  | 11 | 59  |
| Tongsong 2016 [S70]      | Thailand   | 150 (45/105) | 43.0 | B (9), CC (8), M (6), E (7), S (5), Me (3), SCS (2), other (5) | US         | Both                   | NA           | 39 | 6  | 6  | 99  |
| Paul 2017 [S71]          | Bangladesh | 43 (24/19)   | 37.7 | NA                                                             | Doppler US | NA                     | NA           | 22 | 2  | 2  | 17  |
| Al-Asadi 2018 [S72]      | Iraq       | 101 (21/80)  | 41.4 | M (6), S (5), K (3), L (2), CC (2), GC (2), E (1)              | US         | Transabdominal/none    | NA           | 20 | 20 | 1  | 60  |

\*A: adenocarcinoma; B: borderline; P: primary; GC: Germ cell; GrC: Granular cell; E: endometrial; CC: clear cell; M: mucinous; Me: metastatic; S: serous; K: Krukenberg; L: Leiomyosarcoma; SCS: sex cord stromal; R: retroperitoneal; SLC: Sertoli-Leydig cell; Re: recurrence; C: Cystadenocarcinoma; IT: immature teratoma; SC: squamous cell; ES: endodermal sinus; U: Unilocular; M: multilocular; Ep: epithelial; LMP: low malignant potential; U: undifferentiated; Un: unclassified; YS: Yolk sac; FT: fallopian tube; Pa: papillary; MT: malignant teratoma; MMT: mullerian mixed tumor; TP: true positive; FP: false positive; FN: false negative; TN: true negative

**Reference**

- S1. Weiner Z, Thaler I, Beck D, et al. Differentiating malignant from benign ovarian tumors with transvaginal color flow imaging. *Obstet Gynecol* 1992;79:159-62.
- S2. Kurjak A, Schulman H, Sosic A, et al. Transvaginal ultrasound, color flow, and Doppler waveform of the postmenopausal adnexal mass. *Obstet Gynecol* 1992;80:917-21.
- S3. Kurjak A, Predanić M. New scoring system for prediction of ovarian malignancy based on transvaginal color Doppler sonography. *J Ultrasound Med.* 1992;11:631-8.
- S4. Schneider VL, Schneider A, Reed KL. Comparison of Doppler with two-dimensional sonography and CA 125 for prediction of malignancy of pelvic masses. *Obstet Gynecol Clin North Am* 1993;81:983-988
- S5. Brown DL, Frates MC, Laing FC, et al. Ovarian masses: can benign and malignant lesions be differentiated with color and pulsed Doppler US? *Radiology* 1994;190:333-6.
- S6. Zanetta G, Vergani P, Lissoni A. Color Doppler ultrasound in the preoperative assessment of adnexal masses. *Acta Obstet Gynecol Scand.* 1994;73:637-41.
- S7. Levine D, Feldstein VA, Babcook CJ, et al. Sonography of ovarian masses: poor sensitivity of resistive index for identifying malignant lesions. *AJR Am J Roentgenol* 1994;162:1355-9.
- S8. Jain KA. Prospective evaluation of adnexal masses with endovaginal gray-scale and duplex and color Doppler US: correlation with pathologic findings. *Radiology* 1994;191:63-7.
- S9. Bromley B, Goodman H, Benacerraf BR. Comparison between sonographic morphology and Doppler waveform for the diagnosis of ovarian malignancy. *Obstet Gynecol* 1994;83:434-7.
- S10. Salem S, White LM, Lai J. Doppler sonography of adnexal masses: the predictive value of the pulsatility index in benign and malignant disease. *AJR Am J Roentgenol* 1994;163:1147-50.
- S11. Wu CC, Lee CN, Chen TM, et al. Incremental angiogenesis assessed by color Doppler ultrasound in the tumorigenesis of ovarian neoplasms. *Cancer* 1994;73:1251-6.
- S12. Chou CY, Chang CH, Yao BL, et al. Color Doppler ultrasonography and serum CA 125 in the differentiation of benign and malignant ovarian tumors. *J Clin Ultrasound* 1994;22:491-6.
- S13. Franchi M, Beretta P, Ghezzi F, et al. Diagnosis of pelvic masses with transabdominal color Doppler, CA 125 and ultrasonography. *Acta Obstet Gynecol Scand.* 1995;74:734-9.
- S14. Stein SM, Laifer-Narin S, Johnson MB, et al. Differentiation of benign and malignant adnexal masses: relative value of gray-scale, color Doppler, and spectral

Doppler sonography. *AJR Am J Roentgenol* 1995;164:381-6.

S15. Tepper R, Lerner-Geva L, Altaras MM, et al. Transvaginal color flow imaging in the diagnosis of ovarian tumors. *J Ultrasound Med* 1995;14:731-4.

S16. Tailor A, Jurkovic D, Bourne TH, et al. A comparison of intratumoural indices of blood flow velocity and impedance for the diagnosis of ovarian cancer. *Ultrasound Med Biol* 1996;22:837-43.

S17. Prömpeler HJ, Madjar H, Sauerbrei W. Classification of adnexal tumors by transvaginal color Doppler. *Gynecol Oncol* 1996;61:354-63.

S18. Rehn M, Lohmann K, Rempen A. Transvaginal ultrasonography of pelvic masses: evaluation of B-mode technique and Doppler ultrasonography. *Am J Obstet Gynecol* 1996;175:97-104.

S19. Caruso A, Caforio L, Testa AC, et al. Transvaginal color Doppler ultrasonography in the presurgical characterization of adnexal masses. *Gynecol Oncol* 1996;63:184-91.

S20. Anandakumar C, Chew S, Wong YC, et al. Role of transvaginal ultrasound color flow imaging and Doppler waveform analysis in differentiating between benign and malignant ovarian tumors. *Ultrasound Obstet Gynecol.* 1996;7:280-4.

S21. Matthes AC, Moreira de Andrade JM, Bighetti S. Selection of criteria for the treatment of ovarian cysts on the bases of ultrasound and cytology. *Gynecol Obstet Invest* 1996;42:244-8.

S22. Komatsu T, Konishi I, Mandai M, et al. Adnexal masses: transvaginal US and gadolinium- enhanced MR imaging assessment of intratumoral structure. *Radiology* 1996;198:109-15.

S23. Buy JN, Ghossain MA, Hugol D, et al. Characterization of adnexal masses: combination of color Doppler and conventional sonography compared with spectral Doppler analysis alone and conventional sonography alone. *AJR Am J Roentgenol.* 1996;166:385-93.

S24. Strigini FA, Gadducci A, Del Bravo B, et al. Differential diagnosis of adnexal masses with transvaginal sonography, color flow imaging, and serum CA 125 assay in pre- and postmenopausal women. *Gynecol Oncol* 1996;61:68-72.

S25. Tailor A, Jurkovic D, Bourne TH, et al. Sonographic prediction of malignancy in adnexal masses using multivariate logistic regression analysis. *Ultrasound Obstet Gynecol* 1997; 10:41-47.

S26. Valentin L. Gray scale sonography, subjective evaluation of the color Doppler image and measurement of blood flow velocity for distinguishing benign and malignant tumors of suspected adnexal origin. *Eur J Obstet Gynecol Reprod Biol.* 1997;72:63-72.

S27. Reles A, Wein U, Lichtenegger W. Transvaginal color Doppler sonography and conventional sonography in the preoperative assessment of adnexal masses. *J Clin Ultrasound* 1997;25:217-25.

- S28. Yang WT, Yuen PM, Ho SS, et al. Intraoperative laparoscopic sonography for improved preoperative sonographic pathologic characterization of adnexal masses. *J Ultrasound Med* 1998; 17:53-61.
- S29. Buckshee K, Temsu I, Bhatla N, et al. Pelvic examination, transvaginal ultrasound and transvaginal color Doppler sonography as predictors of ovarian cancer. *Int J Gynaecol Obstet* 1998; 61:51-7.
- S30. Emoto M, Udo T, Obama H, et al. The blood flow characteristics in borderline ovarian tumors based on both color Doppler ultrasound and histopathological analyses. *Gynecol Oncol* 1998;70: 351-7.
- S31. Alcázar JL, Jurado M. Prospective evaluation of a logistic model based on sonographic morphologic and color Doppler findings developed to predict adnexal malignancy. *J Ultrasound Med* 1999;18:837-42.
- S32. Schelling M, Braun M, Kuhn W, et al. Combined transvaginal B-mode and color Doppler sonography for differential diagnosis of ovarian tumors: results of a multivariate logistic regression analysis. *Gynecol Oncol* 2000;77:78-86.
- S33. Kupesic S, Kurjak A. Contrast-enhanced, three-dimensional power Doppler sonography for differentiation of adnexal masses. *Obstet Gynecol.* 2000;96:452-8.
- S34. Wanapirak C, Nimitwongsakul S, Tongsong T. Sonographic morphology scores (SMS) for differentiation between benign and malignant ovarian tumor. *J Med Assoc Thai* 2001;84:30-5
- S35. Guerriero S, Alcazar JL, Ajossa S, et al. Comparison of conventional color Doppler imaging and power doppler imaging for the diagnosis of ovarian cancer: results of a European study. *Gynecol Oncol* 2001;83:299-304.
- S36. Kurjak A, Kupesic S, Sparac V, et al. Preoperative evaluation of pelvic tumors by Doppler and three-dimensional sonography. *J Ultrasound Med* 2001;20:829-40.
- S37. Marret H, Ecochard R, Giraudeau B, et al. Color Doppler energy prediction of malignancy in adnexal masses using logistic regression models. *Ultrasound Obstet Gynecol* 2002;20:597-604.
- S38. Guerriero S, Alcazar JL, Coccia ME, et al. Complex pelvic mass as a target of evaluation of vessel distribution by color Doppler sonography for the diagnosis of adnexal malignancies: results of a multicenter European study. *J Ultrasound Med* 2002;21:1105-11.
- S39. Alcázar JL, Galón MJ, García-Manero M, et al. Three-dimensional sonographic morphologic assessment in complex adnexal masses: preliminary experience. *J Ultrasound Med* 2003;22: 249-54.
- S40. Ueland FR, DePriest PD, Pavlik EJ, et al. Preoperative differentiation of malignant from benign ovarian tumors: the efficacy of morphology indexing and Doppler flow sonography. *Gynecol Oncol* 2003;91:46-50.



- S41. Itakura T, Kikkawa F, Kajiyama H, et al. Doppler flow and arterial location in ovarian tumors. *Int J Gynaecol Obstet* 2003;83:277-83.
- S42. Gu WR, Feng YJ, Zhang JH. Efficacy of Levovist in color Doppler ultrasonography of benign and malignant ovarian tumors. *Chin J Ultrasonography* 2013;12:21-24
- S43. Ordén MR, Jurvelin JS, Kirkinen PP. Kinetics of a US contrast agent in benign and malignant adnexal tumors. *Radiology*. 2003;226:405-10.
- S44. D'Arcy TJ, Jayaram V, Lynch M, et al. Ovarian cancer detected non-invasively by contrast-enhanced power Doppler ultrasound. *BJOG* 2004;111:619-22.
- S45. Marret H, Sauget S, Giraudeau B, et al. Contrast-enhanced sonography helps in discrimination of benign from malignant adnexal masses. *J Ultrasound Med* 2004;23:1629-39.
- S46. Alcázar JL, Castillo G. Comparison of 2-dimensional and 3-dimensional power-Doppler imaging in complex adnexal masses for the prediction of ovarian cancer. *Am J Obstet Gynecol* 2005; 192:807-12.
- S47. Marret H, Sauget S, Giraudeau B, et al. Power Doppler vascularity index for predicting malignancy of adnexal masses. *Ultrasound Obstet Gynecol* 2005;25:508-13.
- S48. Erdoğan N, Özçelik B, Serin IS, et al. Doppler ultrasound assessment and serum cancer antigen 125 in the diagnosis of ovarian tumors. *Int J Gynaecol Obstet* 2005;91:146-50.
- S49. Testa AC, Timmerman D, Exacoustos C, et al. The role of CnTI-SonoVue in the diagnosis of ovarian masses with papillary projections: a preliminary study. *Ultrasound Obstet Gynecol* 2007; 29:512-6.
- S50. Testa AC, Timmerman D, Van Belle V, et al. Intravenous contrast ultrasound examination using contrast-tuned imaging (CnTI) and the contrast medium SonoVue for discrimination between benign and malignant adnexal masses with solid components. *Ultrasound Obstet Gynecol* 2009;34:699-710.
- S51. Fleischer AC, Lyschchik A, Jones HW 3rd, et al. Diagnostic parameters to differentiate benign from malignant ovarian masses with contrast-enhanced transvaginal sonography. *J Ultrasound Med* 2009;28:1273-80.
- S52. Zhou Q, Liu BL, Jiang J, et al. Value of color Doppler ultrasonography, contrast-enhanced ultrasound and serum CA-125 detection in differential diagnosis of ovarian masses. *J South Med Univ* 2009;29:2007-2009.
- S53. Veyer L, Marret H, Bleuzen A, et al. Preoperative diagnosis of ovarian tumors using pelvic contrast-enhanced sonography. *J Ultrasound Med* 2010;29:1041-9
- S54. Hassan MRT. Applications of contrast-enhanced ultrasonography in diagnosis and differential of ovarian cancer. *Med J Chin People's Health* 2011;23:2089-2040.
- S55. Zheng QC, Li P, Wang YH, et al. Value of contrast-enhanced ultrasound in differential diagnosis of benign and malignant ovarian lesions. *J Clin Ultrasound in Med* 2011;13: 301-303.

- S56. Huchon C, Metzger U, Bats AS, et al. Value of three-dimensional contrast-enhanced power Doppler ultrasound for characterizing adnexal masses. *J Obstet Gynaecol Res* 2012;38:832-40.
- S57. Wang XT, Wang R, Cui JH, et al. Applications of contrast-enhanced ultrasonography in diagnosis and differential of ovarian masses. *Jiangsu Med J* 2012;38: 88-90.
- S58. Hafeez S, Sufian S, Beg M, et al. Role of ultrasound in characterization of ovarian masses. *Asian Pac J Cancer Prev* 2013;14:603-6.
- S59. Kalmantis K, Rodolakis A, Daskalakis G, et al. Characterization of ovarian tumors and staging ovarian cancer with 3-dimensional power Doppler angiography: correlation with pathologic findings. *Int J Gynecol Cancer* 2013;23:469-74.
- S60. Perez-Medina T, Orensanz I, Pereira A, et al. Three-dimensional angioultrasonography for the prediction of malignancy in ovarian masses. *Gynecol Obstet Invest* 2013;75:120-5.
- S61. Shah D, Shah S, Parikh J, et al. Doppler ultrasound: a good and reliable predictor of ovarian malignancy. *J Obstet Gynaecol India* 201;63:186-9.
- S62. Xiang H, Huang R, Cheng J, et al. Value of three-dimensional contrast-enhanced ultrasound in the diagnosis of small adnexal masses. *Ultrasound Med Biol* 2013;39:761-8
- S63. Zhang Y, Zhou J, Li MX, et al. Clinical value of contrast-enhanced ultrasonography in the qualitative diagnosis of ovarian cancer. *J Clin Ultrasound in Med* 2013;15: 403-405.
- S64. Yang F, Yang TZ, Luo H, et al. Diagnostic value of contrast-enhanced ultrasonography in ovarian tumors. *J Sichuan Univ (Med Sci Edi)* 2013; 44: 424-428.
- S65. Abbas AM, Zahran KM, Nasr A, et al. A new scoring model for characterization of adnexal masses based on two-dimensional gray-scale and colour Doppler sonographic features. *Facts Views Vis Obgyn* 2014;6:68-74.
- S66. Zhang X, Mao Y, Zheng R, et al. The contribution of qualitative CEUS to the determination of malignancy in adnexal masses, indeterminate on conventional US - a multicenter study. *PLoS One* 2014;9:e93843.
- S67. Hu R, Xiang H, Mu Y, et al. Combination of 2- and 3-dimensional contrast-enhanced transvaginal sonography for diagnosis of small adnexal masses. *J Ultrasound Med* 2014;33: 1889-99.
- S68. Utrilla-Layna J, Alcázar JL, Aubá M, et al. Usefulness of 3D power Doppler angiography technique to the third step in the differential diagnosis of adnexal masses. A prospective study[J]. *Ultrasound in Obstet Gynecol* 2014; 45: 613-617
- S69. Zhang F, Zhang ZL. The Diagnostic Value of Transvaginal Sonograph (TVS), Color Doppler, and Serum Tumor Marker CA125, CEA, and AFP in Ovarian Cancer. *Cell Biochem Biophys*. 2015;72:353-7.

- S70. Tongsong T, Tinnangwattana D, Vichak-Ururrote L, ET AL. Comparison of Effectiveness in Differentiating Benign from Malignant Ovarian Masses between IOTA Simple Rules and Subjective Sonographic Assessment. *Asian Pac J Cancer Prev* 2016;17:4377-4380.
- S71. Paul P, Talukder S, Sangma MA, et al. Detection of Ovarian Tumor by Color Doppler Ultrasonography and CA-125. *Mymensingh Med J* 2017;26:705-709.
- S72. Al-Asadi JN, Al-Maliki SK, Al-Dahhhan F, et al. The accuracy of risk malignancy index in prediction of malignancy in women with adnexal mass in Basrah, Iraq. *Niger J Clin Pract* 2018;21: 1254-1259.
