# Supplementary material
Source: HighWire-hosted journal article supplement (https://bmjopen.bmj.com/content/11/12/e052830)
Supplement: inline-supplementary-material-2 [file inline-supplementary-material-2.pdf]

Table S1. QUADAS-2 Scoring of Included Studies

| AUTHORS              | PATIENT SELECTION               |                                 | INDEX TEST                         |                             | REFERENCE STANDARD              | RISK OF BIAS    |                       |                           | APPLICABILITY                         |
|----------------------|---------------------------------|---------------------------------|------------------------------------|-----------------------------|---------------------------------|-----------------|-----------------------|---------------------------|---------------------------------------|
|                      | Consecutive patient enrollment? | Appropriate exclusion criteria? | Inter- or intra-rater reliability? | US training prior to study? | Always same reference standard? | Selection bias? | Bias from index test? | Bias from reference test? | Risk of inappropriate reference test? |
| Weiner 1992 [S1]     | Yes                             | Yes                             | No                                 | Unclear                     | Yes                             | Inter           | Low                   | Low                       | Low                                   |
| Kurjak 1992 [S2]     | Yes                             | Yes                             | No                                 | Unclear                     | Yes                             | Low             | Low                   | Low                       | Low                                   |
| Kurjak 1992 [S3]     | Yes                             | Yes                             | No                                 | Unclear                     | Yes                             | Low             | Low                   | Low                       | Low                                   |
| Schneider 1993 [S4]  | Yes                             | Yes                             | No                                 | Unclear                     | Yes                             | Inter           | Low                   | Low                       | Low                                   |
| Brown 1994 [S5]      | Yes                             | Yes                             | No                                 | No                          | Yes                             | Inter           | Low                   | Low                       | Low                                   |
| Zanetta 1994 [S6]    | Yes                             | Yes                             | No                                 | Yes                         | Yes                             | Low             | Low                   | Low                       | Low                                   |
| Levine 1994 [S7]     | Yes                             | Yes                             | No                                 | No                          | Yes                             | Inter           | Low                   | Low                       | Low                                   |
| Jain 1994 [S8]       | Yes                             | Yes                             | No                                 | No                          | Yes                             | Inter           | Low                   | Low                       | Low                                   |
| Bromley 1994 [S9]    | Yes                             | Yes                             | No                                 | Unclear                     | Yes                             | High            | Low                   | Low                       | Low                                   |
| Salem 1994 [S10]     | Yes                             | Yes                             | No                                 | No                          | Yes                             | Inter           | Low                   | Low                       | Low                                   |
| Wu 1994 [S11]        | Yes                             | Yes                             | No                                 | Unclear                     | Yes                             | Low             | Low                   | Low                       | Low                                   |
| Chou 1994 [S12]      | Yes                             | Yes                             | No                                 | Unclear                     | Yes                             | Inter           | Low                   | Low                       | Low                                   |
| Franchi 1995 [S13]   | Yes                             | Yes                             | No                                 | Yes                         | Yes                             | Inter           | Low                   | Low                       | Low                                   |
| Stein 1995 [S14]     | Yes                             | Yes                             | No                                 | No                          | Yes                             | Low             | Low                   | Low                       | Low                                   |
| Tepper 1995 [S15]    | Yes                             | Yes                             | No                                 | No                          | Yes                             | Low             | Low                   | Low                       | Low                                   |
| Tailor 1996 [S16]    | Yes                             | Yes                             | No                                 | No                          | Yes                             | High            | Low                   | Low                       | Low                                   |
| Prompeler 1996 [S17] | Yes                             | Yes                             | No                                 | Yes                         | Yes                             | Low             | Low                   | Low                       | Low                                   |
| Rehn 1996 [S18]      | Yes                             | Yes                             | No                                 | No                          | Yes                             | Low             | Low                   | Low                       | Low                                   |
| Caruso 1996 [S19]    | Yes                             | Yes                             | No                                 | No                          | Yes                             | Inter           | Low                   | Low                       | Low                                   |

|                        |     |     |    |         |     |       |     |     |     |
|------------------------|-----|-----|----|---------|-----|-------|-----|-----|-----|
| Anandakumar 1996 [S20] | Yes | Yes | No | No      | Yes | Inter | Low | Low | Low |
| Matthes 1996 [S21]     | Yes | Yes | No | No      | Yes | High  | Low | Low | Low |
| Komatsu 1996 [S22]     | Yes | Yes | No | No      | Yes | High  | Low | Low | Low |
| Buy 1996 [S23]         | Yes | Yes | No | Yes     | Yes | Inter | Low | Low | Low |
| Strigini 1996 [S24]    | Yes | Yes | No | No      | Yes | Inter | Low | Low | Low |
| Tailor 1997 [S25]      | Yes | Yes | No | No      | Yes | Inter | Low | Low | Low |
| Valentin 1997 [S26]    | Yes | Yes | No | No      | Yes | Low   | Low | Low | Low |
| Reles 1997 [S27]       | Yes | Yes | No | No      | Yes | Inter | Low | Low | Low |
| Yang 1998 [S28]        | Yes | Yes | No | Unclear | Yes | Inter | Low | Low | Low |
| Buckshee 1998 [S29]    | Yes | Yes | No | No      | Yes | High  | Low | Low | Low |
| Emoto 1998 [S30]       | Yes | Yes | No | No      | Yes | Inter | Low | Low | Low |
| Alcazar 1999 [S31]     | Yes | Yes | No | No      | Yes | Inter | Low | Low | Low |
| Schelling 2000 [S32]   | Yes | Yes | No | No      | Yes | Inter | Low | Low | Low |
| Kupesic 2000 [S33]     | Yes | Yes | No | Yes     | Yes | High  | Low | Low | Low |
| Wanapirak 2001 [S34]   | Yes | Yes | No | No      | Yes | High  | Low | Low | Low |
| Guerrero 2001 [S35]    | Yes | Yes | No | No      | Yes | Low   | Low | Low | Low |
| Kurjak 2001 [S36]      | Yes | Yes | No | No      | Yes | Low   | Low | Low | Low |
| Marret 2002 [S37]      | Yes | Yes | No | No      | Yes | Inter | Low | Low | Low |
| Guerrero 2002 [S38]    | Yes | Yes | No | Unclear | Yes | Low   | Low | Low | Low |
| Alcazar 2003 [S39]     | Yes | Yes | No | Unclear | Yes | Inter | Low | Low | Low |
| Ueland 2003 [S40]      | Yes | Yes | No | No      | Yes | Low   | Low | Low | Low |
| Itakura 2003 [S41]     | Yes | Yes | No | No      | Yes | Inter | Low | Low | Low |
| Gu 2003 [S42]          | Yes | Yes | No | No      | Yes | High  | Low | Low | Low |
| Orden 2003 [S43]       | Yes | Yes | No | No      | Yes | Low   | Low | Low | Low |
| D'Arcy 2004 [S44]      | Yes | Yes | No | No      | Yes | Inter | Low | Low | Low |

|                          |     |     |    |    |     |       |     |     |     |
|--------------------------|-----|-----|----|----|-----|-------|-----|-----|-----|
| Marret 2004 [S45]        | Yes | Yes | No | No | Yes | Inter | Low | Low | Low |
| Alcazar 2005 [S46]       | Yes | Yes | No | No | Yes | Inter | Low | Low | Low |
| Marret 2005 [S47]        | Yes | Yes | No | No | Yes | Inter | Low | Low | Low |
| Erdogan 2005 [S48]       | Yes | Yes | No | No | Yes | Inter | Low | Low | Low |
| Testa 2007 [S49]         | Yes | Yes | No | No | Yes | Inter | Low | Low | Low |
| Testa 2009 [S50]         | Yes | Yes | No | No | Yes | Inter | Low | Low | Low |
| Fleischer 2009 [S51]     | Yes | Yes | No | No | Yes | Inter | Low | Low | Low |
| Zhou 2009 [S52]          | Yes | Yes | No | No | Yes | High  | Low | Low | Low |
| Veyer 2010 [S53]         | Yes | Yes | No | No | Yes | Inter | Low | Low | Low |
| Hassan 2011 [S54]        | Yes | Yes | No | No | Yes | High  | Low | Low | Low |
| Zheng 2011 [S55]         | Yes | Yes | No | No | Yes | High  | Low | Low | Low |
| Huchon 2012 [S56]        | Yes | Yes | No | No | Yes | Inter | Low | Low | Low |
| Wang 2012 [S57]          | Yes | Yes | No | No | Yes | High  | Low | Low | Low |
| Hafeez 2013 [S58]        | Yes | Yes | No | No | Yes | Inter | Low | Low | Low |
| Kalmantis 2013 [S59]     | Yes | Yes | No | No | Yes | Inter | Low | Low | Low |
| Perez-Medina 2013 [S60]  | Yes | Yes | No | No | Yes | Inter | Low | Low | Low |
| Shah 2013 [S61]          | Yes | Yes | No | No | Yes | Inter | Low | Low | Low |
| Xiang 2013 [S62]         | Yes | Yes | No | No | Yes | High  | Low | Low | Low |
| Zhang 2013 [S63]         | Yes | Yes | No | No | Yes | High  | Low | Low | Low |
| Yang 2013 [S64]          | Yes | Yes | No | No | Yes | Inter | Low | Low | Low |
| Abbas 2014 [S65]         | Yes | Yes | No | No | Yes | Inter | Low | Low | Low |
| Zhang 2014 [S66]         | Yes | Yes | No | No | Yes | High  | Low | Low | Low |
| Hu 2014 [S67]            | Yes | Yes | No | No | Yes | High  | Low | Low | Low |
| Utrilla-Layna 2015 [S68] | Yes | Yes | No | No | Yes | Inter | Low | Low | Low |
| Zhang 2015 [S69]         | Yes | Yes | No | No | Yes | Inter | Low | Low | Low |

|                     |     |     |    |    |     |       |     |     |     |
|---------------------|-----|-----|----|----|-----|-------|-----|-----|-----|
| Tongsong 2016 [S70] | Yes | Yes | No | No | Yes | Inter | Low | Low | Low |
| Paul 2017 [S71]     | Yes | Yes | No | No | Yes | High  | Low | Low | Low |
| Al-Asadi 2018 [S72] | Yes | Yes | No | No | Yes | High  | Low | Low | Low |

### Reference

- S1. Weiner Z, Thaler I, Beck D, et al. Differentiating malignant from benign ovarian tumors with transvaginal color flow imaging. *Obstet Gynecol* 1992;79:159-62.
- S2. Kurjak A, Schulman H, Sosic A, et al. Transvaginal ultrasound, color flow, and Doppler waveform of the postmenopausal adnexal mass. *Obstet Gynecol* 1992;80:917-21.
- S3. Kurjak A, Predanić M. New scoring system for prediction of ovarian malignancy based on transvaginal color Doppler sonography. *J Ultrasound Med*. 1992;11:631-8.
- S4. Schneider VL, Schneider A, Reed KL. Comparison of Doppler with two-dimensional sonography and CA 125 for prediction of malignancy of pelvic masses. *Obstet Gynecol Clin North Am* 1993;81:983-988
- S5. Brown DL, Frates MC, Laing FC, et al. Ovarian masses: can benign and malignant lesions be differentiated with color and pulsed Doppler US? *Radiology* 1994;190:333-6.
- S6. Zanetta G, Vergani P, Lissoni A. Color Doppler ultrasound in the preoperative assessment of adnexal masses. *Acta Obstet Gynecol Scand*. 1994;73:637-41.
- S7. Levine D, Feldstein VA, Babcook CJ, et al. Sonography of ovarian masses: poor sensitivity of resistive index for identifying malignant lesions. *AJR Am J Roentgenol* 1994;162:1355-9.

- S8. Jain KA. Prospective evaluation of adnexal masses with endovaginal gray-scale and duplex and color Doppler US: correlation with pathologic findings. *Radiology* 1994;191:63-7.
- S9. Bromley B, Goodman H, Benacerraf BR. Comparison between sonographic morphology and Doppler waveform for the diagnosis of ovarian malignancy. *Obstet Gynecol* 1994;83:434-7.
- S10. Salem S, White LM, Lai J. Doppler sonography of adnexal masses: the predictive value of the pulsatility index in benign and malignant disease. *AJR Am J Roentgenol* 1994;163:1147-50.
- S11. Wu CC, Lee CN, Chen TM, et al. Incremental angiogenesis assessed by color Doppler ultrasound in the tumorigenesis of ovarian neoplasms. *Cancer* 1994;73:1251-6.
- S12. Chou CY, Chang CH, Yao BL, et al. Color Doppler ultrasonography and serum CA 125 in the differentiation of benign and malignant ovarian tumors. *J Clin Ultrasound* 1994;22:491-6.
- S13. Franchi M, Beretta P, Ghezzi F, et al. Diagnosis of pelvic masses with transabdominal color Doppler, CA 125 and ultrasonography. *Acta Obstet Gynecol Scand*. 1995;74:734-9.
- S14. Stein SM, Laifer-Narin S, Johnson MB, et al. Differentiation of benign and malignant adnexal masses: relative value of gray-scale, color Doppler, and spectral Doppler sonography. *AJR Am J Roentgenol* 1995;164:381-6.
- S15. Tepper R, Lerner-Geva L, Altaras MM, et al. Transvaginal color flow imaging in the diagnosis of ovarian tumors. *J Ultrasound Med* 1995;14:731-4.
- S16. Tailor A, Jurkovic D, Bourne TH, et al. A comparison of intratumoural indices of blood flow velocity and impedance for the diagnosis of ovarian cancer. *Ultrasound Med Biol* 1996;22:837-43.

- S17. Prömpeler HJ, Madjar H, Sauerbrei W. Classification of adnexal tumors by transvaginal color Doppler. *Gynecol Oncol* 1996;61:354-63.
- S18. Rehn M, Lohmann K, Rempen A. Transvaginal ultrasonography of pelvic masses: evaluation of B-mode technique and Doppler ultrasonography. *Am J Obstet Gynecol* 1996;175:97-104.
- S19. Caruso A, Caforio L, Testa AC, et al. Transvaginal color Doppler ultrasonography in the presurgical characterization of adnexal masses. *Gynecol Oncol* 1996;63:184-91.
- S20. Anandakumar C, Chew S, Wong YC, et al. Role of transvaginal ultrasound color flow imaging and Doppler waveform analysis in differentiating between benign and malignant ovarian tumors. *Ultrasound Obstet Gynecol.* 1996;7:280-4.
- S21. Matthes AC, Moreira de Andrade JM, Bighetti S. Selection of criteria for the treatment of ovarian cysts on the bases of ultrasound and cytology. *Gynecol Obstet Invest* 1996;42:244-8.
- S22. Komatsu T, Konishi I, Mandai M, et al. Adnexal masses: transvaginal US and gadolinium- enhanced MR imaging assessment of intratumoral structure. *Radiology* 1996;198:109-15.
- S23. Buy JN, Ghossain MA, Hugol D, et al. Characterization of adnexal masses: combination of color Doppler and conventional sonography compared with spectral Doppler analysis alone and conventional sonography alone. *AJR Am J Roentgenol.* 1996;166:385-93.
- S24. Strigini FA, Gadducci A, Del Bravo B, et al. Differential diagnosis of adnexal masses with transvaginal sonography, color flow imaging, and serum CA 125 assay in pre- and postmenopausal women. *Gynecol Oncol* 1996;61:68-72.
- S25. Tailor A, Jurkovic D, Bourne TH, et al. Sonographic prediction of malignancy in adnexal masses using multivariate logistic regression analysis. *Ultrasound Obstet Gynecol* 1997; 10:41-47.

- S26. Valentin L. Gray scale sonography, subjective evaluation of the color Doppler image and measurement of blood flow velocity for distinguishing benign and malignant tumors of suspected adnexal origin. *Eur J Obstet Gynecol Reprod Biol.* 1997;72:63-72.
- S27. Reles A, Wein U, Lichtenegger W. Transvaginal color Doppler sonography and conventional sonography in the preoperative assessment of adnexal masses. *J Clin Ultrasound* 1997;25:217-25.
- S28. Yang WT, Yuen PM, Ho SS, et al. Intraoperative laparoscopic sonography for improved preoperative sonographic pathologic characterization of adnexal masses. *J Ultrasound Med* 1998; 17:53-61.
- S29. Buckshee K, Temsu I, Bhatla N, et al. Pelvic examination, transvaginal ultrasound and transvaginal color Doppler sonography as predictors of ovarian cancer. *Int J Gynaecol Obstet* 1998; 61:51-7.
- S30. Emoto M, Udo T, Obama H, et al. The blood flow characteristics in borderline ovarian tumors based on both color Doppler ultrasound and histopathological analyses. *Gynecol Oncol* 1998;70: 351-7.
- S31. Alcázar JL, Jurado M. Prospective evaluation of a logistic model based on sonographic morphologic and color Doppler findings developed to predict adnexal malignancy. *J Ultrasound Med* 1999;18:837-42.
- S32. Schelling M, Braun M, Kuhn W, et al. Combined transvaginal B-mode and color Doppler sonography for differential diagnosis of ovarian tumors: results of a multivariate logistic regression analysis. *Gynecol Oncol* 2000;77:78-86.
- S33. Kupesic S, Kurjak A. Contrast-enhanced, three-dimensional power Doppler sonography for differentiation of adnexal masses. *Obstet Gynecol.* 2000;96:452-8.
- S34. Wanapirak C, Nimitwongsakul S, Tongsong T. Sonographic morphology scores (SMS) for differentiation between benign and malignant ovarian tumor. *J Med Assoc Thai* 2001;84:30-5.

- S35. Guerriero S, Alcazar JL, Ajossa S, et al. Comparison of conventional color Doppler imaging and power doppler imaging for the diagnosis of ovarian cancer: results of a European study. *Gynecol Oncol* 2001;83:299-304.
- S36. Kurjak A, Kupesic S, Sparac V, et al. Preoperative evaluation of pelvic tumors by Doppler and three-dimensional sonography. *J Ultrasound Med* 2001;20:829-40.
- S37. Marret H, Ecochard R, Giraudeau B, et al. Color Doppler energy prediction of malignancy in adnexal masses using logistic regression models. *Ultrasound Obstet Gynecol* 2002;20:597-604.
- S38. Guerriero S, Alcazar JL, Coccia ME, et al. Complex pelvic mass as a target of evaluation of vessel distribution by color Doppler sonography for the diagnosis of adnexal malignancies: results of a multicenter European study. *J Ultrasound Med* 2002;21:1105-11.
- S39. Alcázar JL, Galón MJ, García-Manero M, et al. Three-dimensional sonographic morphologic assessment in complex adnexal masses: preliminary experience. *J Ultrasound Med* 2003;22: 249-54.
- S40. Ueland FR, DePriest PD, Pavlik EJ, et al. Preoperative differentiation of malignant from benign ovarian tumors: the efficacy of morphology indexing and Doppler flow sonography. *Gynecol Oncol* 2003;91:46-50.
- S41. Itakura T, Kikkawa F, Kajiyama H, et al. Doppler flow and arterial location in ovarian tumors. *Int J Gynaecol Obstet* 2003;83:277-83.
- S42. Gu WR, Feng YJ, Zhang JH. Efficacy of Levovist in color Doppler ultrasonography of benign and malignant ovarian tumors. *Chin J Ultrasonography* 2013;12:21-24
- S43. Ordén MR, Jurvelin JS, Kirkinen PP. Kinetics of a US contrast agent in benign and malignant adnexal tumors. *Radiology*. 2003;226:405-10.
- S44. D'Arcy TJ, Jayaram V, Lynch M, et al. Ovarian cancer detected non-invasively by contrast-enhanced power Doppler ultrasound. *BJOG* 2004;111:619-22.



- S45. Marret H, Sauget S, Giraudeau B, et al. Contrast-enhanced sonography helps in discrimination of benign from malignant adnexal masses. *J Ultrasound Med* 2004;23:1629-39.
- S46. Alcázar JL, Castillo G. Comparison of 2-dimensional and 3-dimensional power-Doppler imaging in complex adnexal masses for the prediction of ovarian cancer. *Am J Obstet Gynecol* 2005; 192:807-12.
- S47. Marret H, Sauget S, Giraudeau B, et al. Power Doppler vascularity index for predicting malignancy of adnexal masses. *Ultrasound Obstet Gynecol* 2005;25:508-13.
- S48. Erdoğan N, Özçelik B, Serin IS, et al. Doppler ultrasound assessment and serum cancer antigen 125 in the diagnosis of ovarian tumors. *Int J Gynaecol Obstet* 2005;91:146-50.
- S49. Testa AC, Timmerman D, Exacoustos C, et al. The role of CnTI-SonoVue in the diagnosis of ovarian masses with papillary projections: a preliminary study. *Ultrasound Obstet Gynecol* 2007; 29:512-6.
- S50. Testa AC, Timmerman D, Van Belle V, et al. Intravenous contrast ultrasound examination using contrast-tuned imaging (CnTI) and the contrast medium SonoVue for discrimination between benign and malignant adnexal masses with solid components. *Ultrasound Obstet Gynecol* 2009;34:699-710.
- S51. Fleischer AC, Lyschik A, Jones HW 3rd, et al. Diagnostic parameters to differentiate benign from malignant ovarian masses with contrast-enhanced transvaginal sonography. *J Ultrasound Med* 2009;28:1273-80.
- S52. Zhou Q, Liu BL, Jiang J, et al. Value of color Doppler ultrasonography, contrast-enhanced ultrasound and serum CA-125 detection in differential diagnosis of ovarian masses. *J South Med Univ* 2009;29:2007-2009.
- S53. Veyer L, Marret H, Bleuzen A, et al. Preoperative diagnosis of ovarian tumors using pelvic contrast-enhanced sonography. *J Ultrasound Med* 2010;29:1041-9.

- S54. Hassan MRT. Applications of contrast-enhanced ultrasonography in diagnosis and differential of ovarian cancer. *Med J Chin People's Health* 2011;23:2089-2040.
- S55. Zheng QC, Li P, Wang YH, et al. Value of contrast-enhanced ultrasound in differential diagnosis of benign and malignant ovarian lesions. *J Clin Ultrasound in Med* 2011;13: 301-303.
- S56. Huchon C, Metzger U, Bats AS, et al. Value of three-dimensional contrast-enhanced power Doppler ultrasound for characterizing adnexal masses. *J Obstet Gynaecol Res* 2012;38:832-40.
- S57. Wang XT, Wang R, Cui JH, et al. Applications of contrast-enhanced ultrasonography in diagnosis and differential of ovarian masses. *Jiangsu Med J* 2012;38: 88-90.
- S58. Hafeez S, Sufian S, Beg M, et al. Role of ultrasound in characterization of ovarian masses. *Asian Pac J Cancer Prev* 2013;14:603-6.
- S59. Kalmantis K, Rodolakis A, Daskalakis G, et al. Characterization of ovarian tumors and staging ovarian cancer with 3-dimensional power Doppler angiography: correlation with pathologic findings. *Int J Gynecol Cancer* 2013;23:469-74.
- S60. Perez-Medina T, Orensanz I, Pereira A, et al. Three-dimensional angioultrasonography for the prediction of malignancy in ovarian masses. *Gynecol Obstet Invest* 2013;75:120-5.
- S61. Shah D, Shah S, Parikh J, et al. Doppler ultrasound: a good and reliable predictor of ovarian malignancy. *J Obstet Gynaecol India* 201;63:186-9.
- S62. Xiang H, Huang R, Cheng J, et al. Value of three-dimensional contrast-enhanced ultrasound in the diagnosis of small adnexal masses. *Ultrasound Med Biol* 2013;39:761-8.

- S63. Zhang Y, Zhou J, Li MX, et al. Clinical value of contrast-enhanced ultrasonography in the qualitative diagnosis of ovarian cancer. *J Clin Ultrasound in Med* 2013;15: 403-405.
- S64. Yang F, Yang TZ, Luo H, et al. Diagnostic value of contrast-enhanced ultrasonography in ovarian tumors. *J Sichuan Univ (Med Sci Edi)* 2013; 44: 424-428.
- S65. Abbas AM, Zahran KM, Nasr A, et al. A new scoring model for characterization of adnexal masses based on two-dimensional gray-scale and colour Doppler sonographic features. *Facts Views Vis Obgyn* 2014;6:68-74.
- S66. Zhang X, Mao Y, Zheng R, et al. The contribution of qualitative CEUS to the determination of malignancy in adnexal masses, indeterminate on conventional US - a multicenter study. *PLoS One* 2014;9:e93843.
- S67. Hu R, Xiang H, Mu Y, et al. Combination of 2- and 3-dimensional contrast-enhanced transvaginal sonography for diagnosis of small adnexal masses. *J Ultrasound Med* 2014;33: 1889-99.
- S68. Utrilla-Layna J, Alcázar JL, Aubá M, et al. Usefulness of 3D power Doppler angiography technique to the third step in the differential diagnosis of adnexal masses. A prospective study[J]. *Ultrasound in Obstet Gynecol* 2014; 45: 613-617
- S69. Zhang F, Zhang ZL. The Diagnostic Value of Transvaginal Sonograph (TVS), Color Doppler, and Serum Tumor Marker CA125, CEA, and AFP in Ovarian Cancer. *Cell Biochem Biophys*. 2015;72:353-7.
- S70. Tongsong T, Tinnangwattana D, Vichak-Ururrote L, ET AL. Comparison of Effectiveness in Differentiating Benign from Malignant Ovarian Masses between IOTA Simple Rules and Subjective Sonographic Assessment. *Asian Pac J Cancer Prev* 2016;17:4377-4380.
- S71. Paul P, Talukder S, Sangma MA, et al. Detection of Ovarian Tumor by Color Doppler Ultrasonography and CA-125. *Mymensingh Med J* 2017;26:705-709.

S72. Al-Asadi JN, Al-Maliki SK, Al-Dahhhan F, et al. The accuracy of risk malignancy index in prediction of malignancy in women with adnexal mass in Basrah, Iraq. Niger J Clin Pract 2018;21: 1254-1259.
