# Supplementary material
Source: HighWire-hosted journal article supplement (https://bmjopen.bmj.com/content/11/12/e052830)
Supplement: inline-supplementary-material-3 [file inline-supplementary-material-3.pdf]

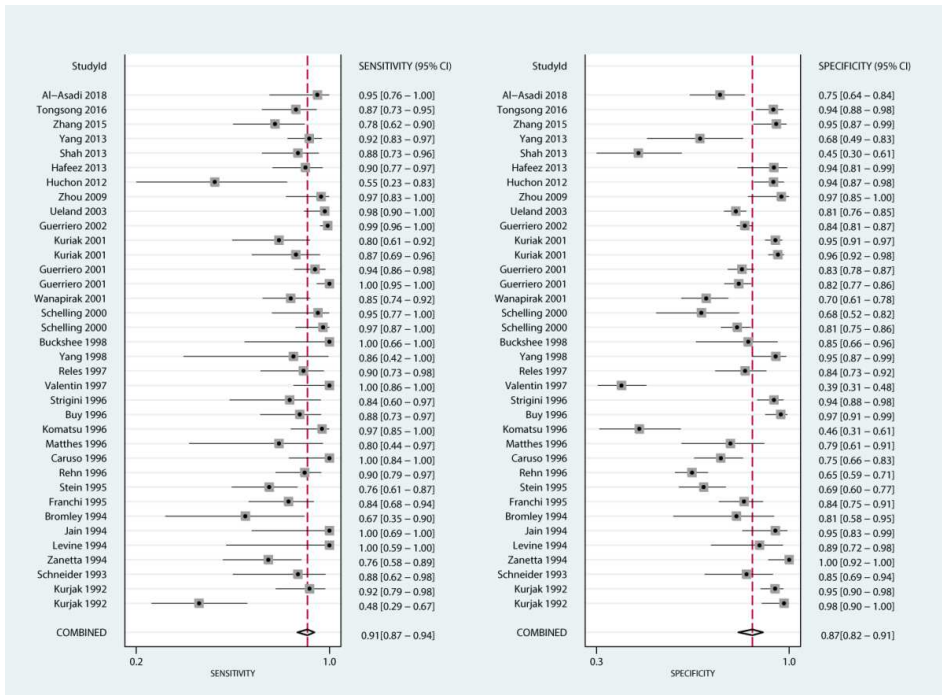

Figure S1. The pooled sensitivity and specificity for US differentiate the benign and malignant ovarian masses

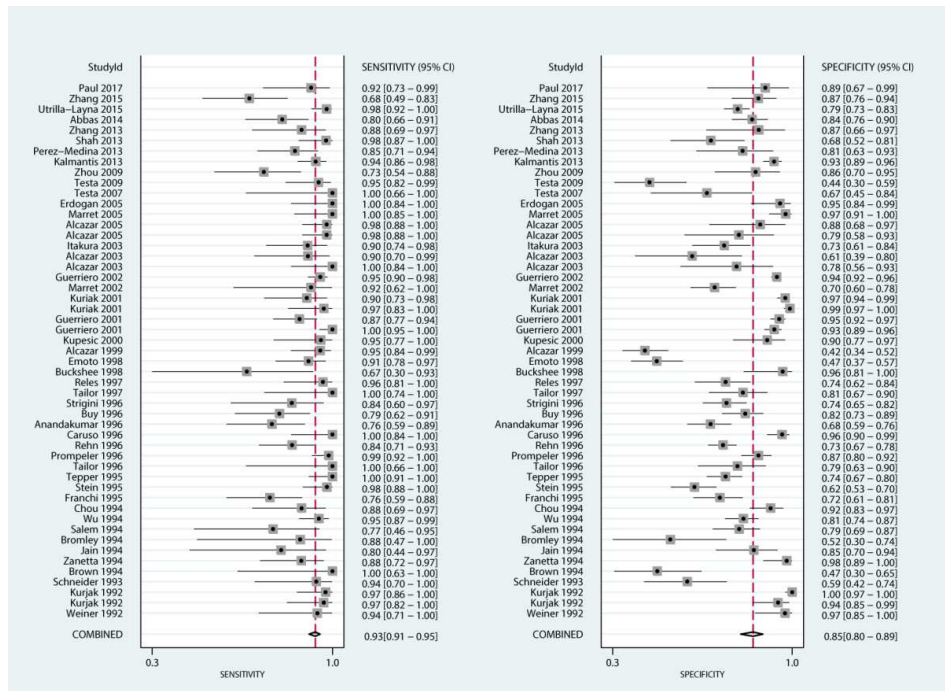

Figure S2. The pooled sensitivity and specificity for Doppler US differentiate the benign and malignant ovarian masses

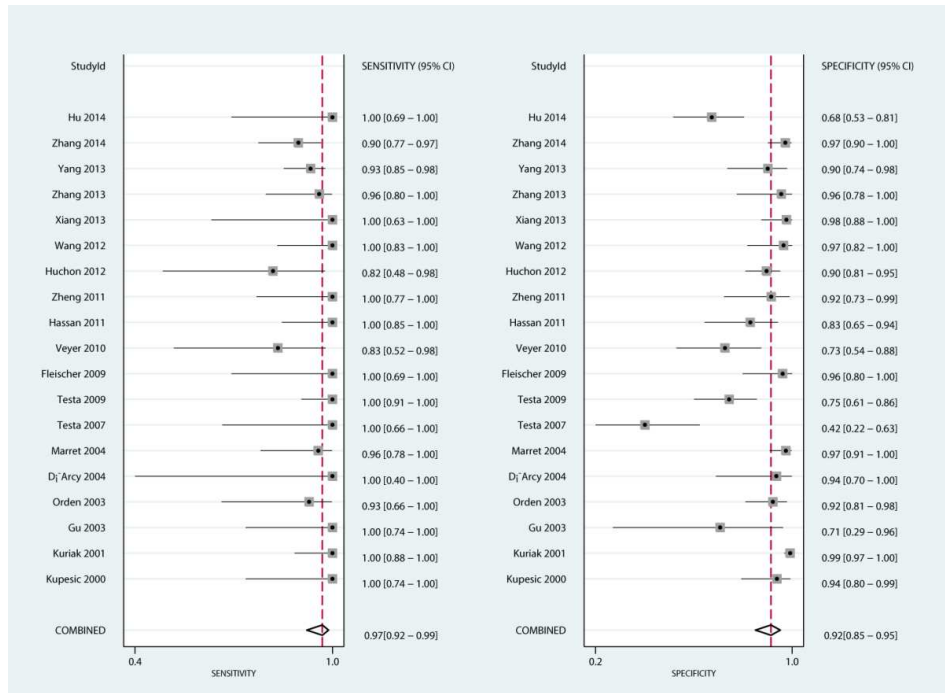

Figure S3. The pooled sensitivity and specificity for CEUS differentiate the benign and malignant ovarian masses
