# Supplementary material
Source: HighWire-hosted journal article supplement (https://bmjopen.bmj.com/content/11/12/e052830)
Supplement: inline-supplementary-material-4 [file inline-supplementary-material-4.pdf]

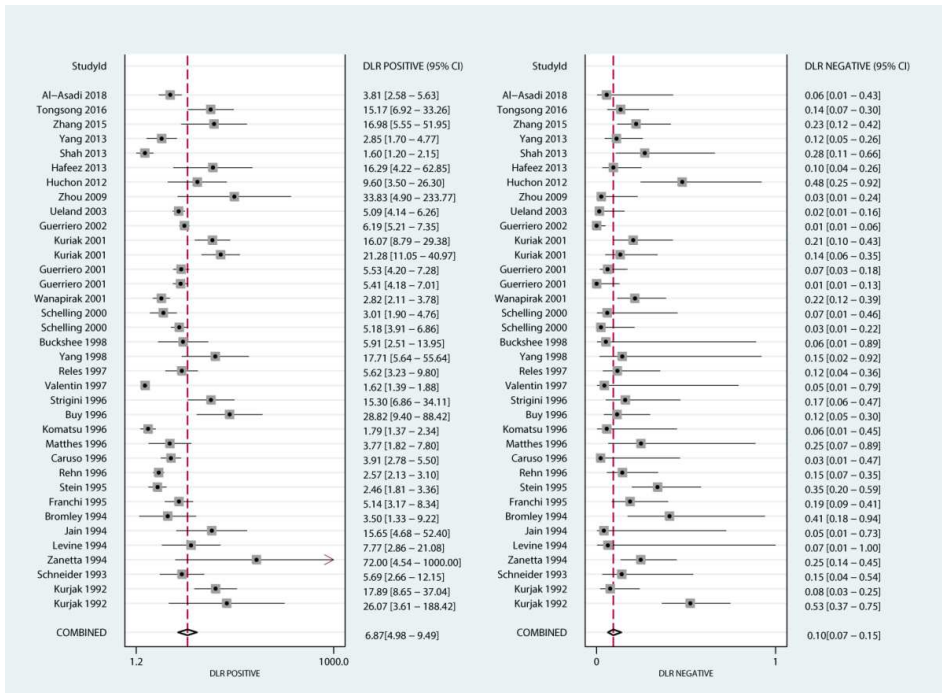

Figure S1. The pooled PLR and NLR for US differentiate the benign and malignant ovarian masses

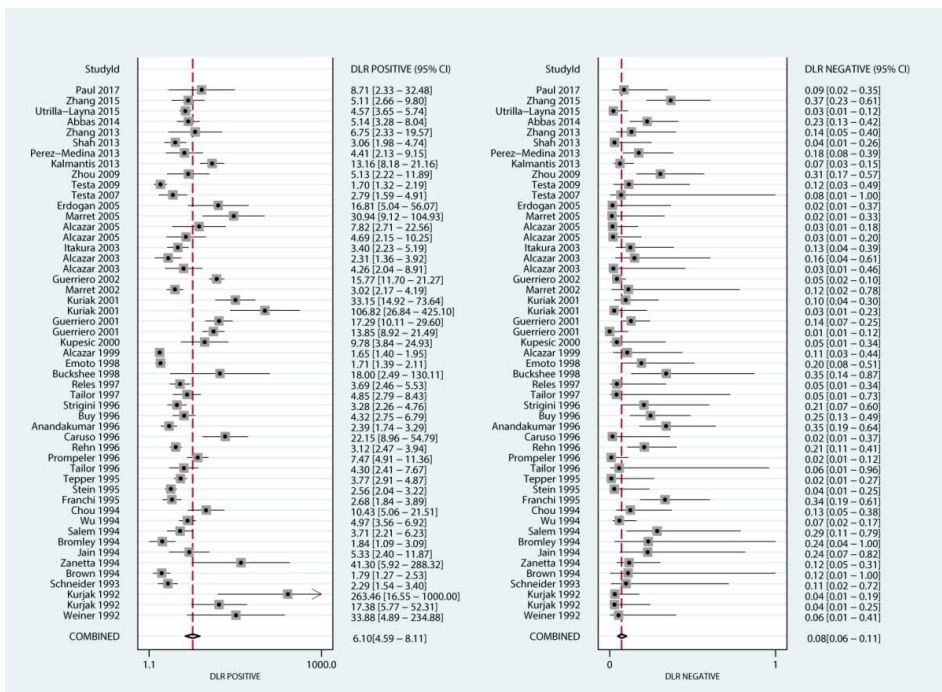

Figure S2. The pooled PLR and NLR for Doppler US differentiate the benign and malignant ovarian masses

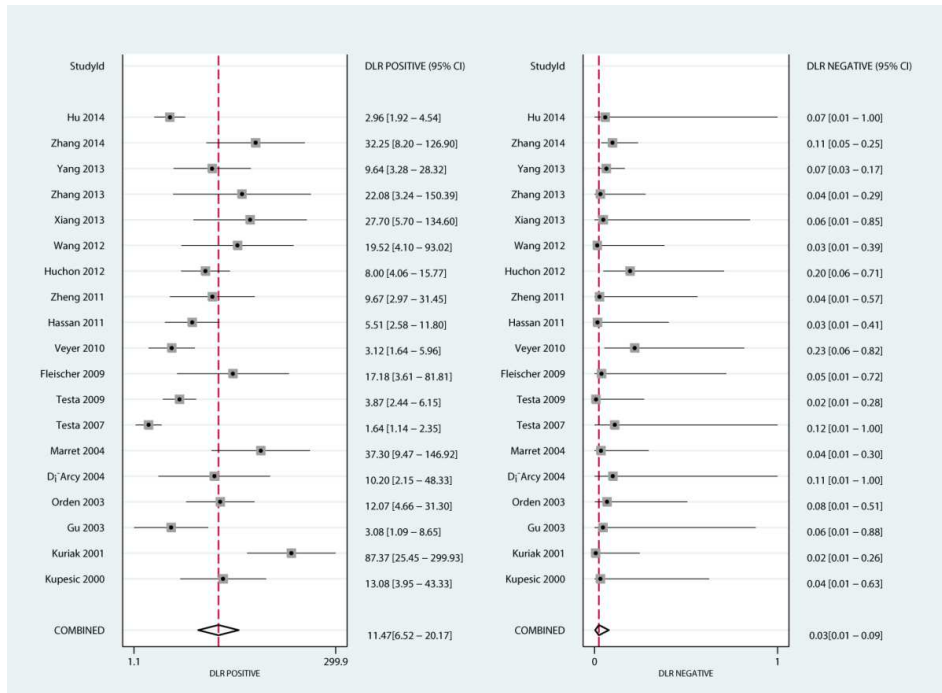

Figure S3. The pooled PLR and NLR for CEUS differentiate the benign and malignant ovarian masses
